# Supplementary material for: Insect herbivory dampens Subarctic birch forest C sink response to warming
Source: PubMed Central journal article supplement (PMC7242322; doi:10.1038/s41467-020-16404-4), 2020-05-21
Supplement: 41467_2020_16404_MOESM1_ESM.pdf [file 41467_2020_16404_MOESM1_ESM.pdf]

**Supplementary Information for**

**Insect herbivory dampens Subarctic birch forest C sink response to warming**

Silfver et al.

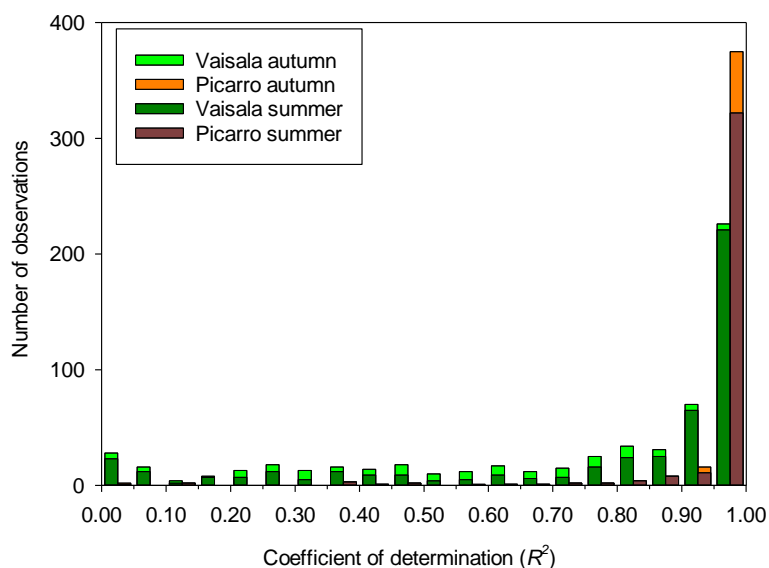

**Supplementary Figure 1.** The distribution of  $R^2$  values of linear regressions used in the  $\text{CO}_2$  flux calculation. Online, fast-response ( $\sim 1$  Hz) sampling of concentration changes in the chamber facilitates the calculation procedure due to a large number of data points, resulting in a small measurement error. The vast majority of  $R^2$  values for the Picarro G2401-based measurements were  $>0.95$ . With the Vaisala GMP343-based system, the  $R^2$  values were lower, especially with the low fluxes during autumn. However, the lower  $R^2$  values were mostly due to the random analyzer noise and only 12 of the 1020 linear regressions fitted to the data had a  $P > 0.05$  (with two-sided significance tests). All of these cases were related to a small  $\text{CO}_2$  flux ( $-0.009$  to  $0.004$   $\text{mg CO}_2 \text{ m}^{-2} \text{ s}^{-1}$ ). Source data are provided as a Source Data file.

**a**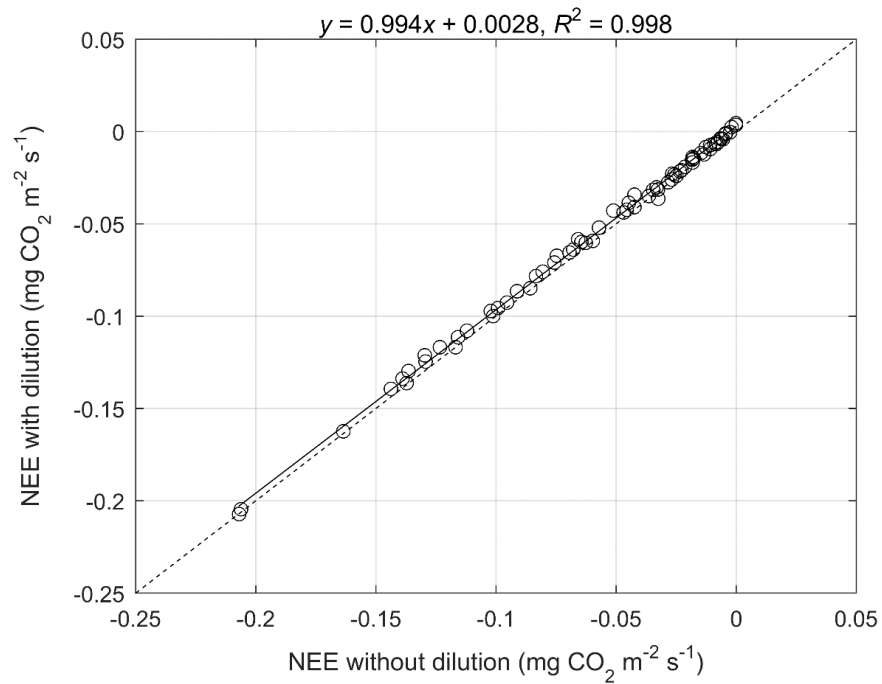**b**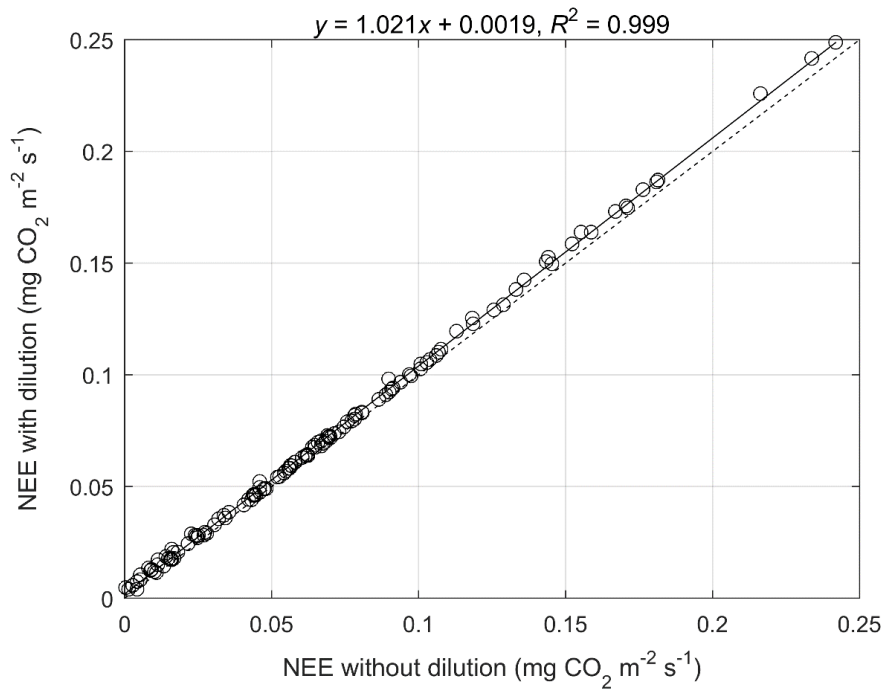

**Supplementary Figure 2.** Scatterplots of net ecosystem exchange NEE fluxes with and without dilution correction in the data recorded using the Vaisala GMP343 analyzer for **a** negative and **b** positive fluxes. The CO<sub>2</sub> mixing ratios measured using the Picarro G2401 are internally corrected for water vapour. In the GMP343-based system, we measured the relative humidity inside the chamber, but the sensor broke down during the measurement period. As shown here, the dilution effect is very limited and no correction was applied to these data. Source data are provided as a Source Data file.

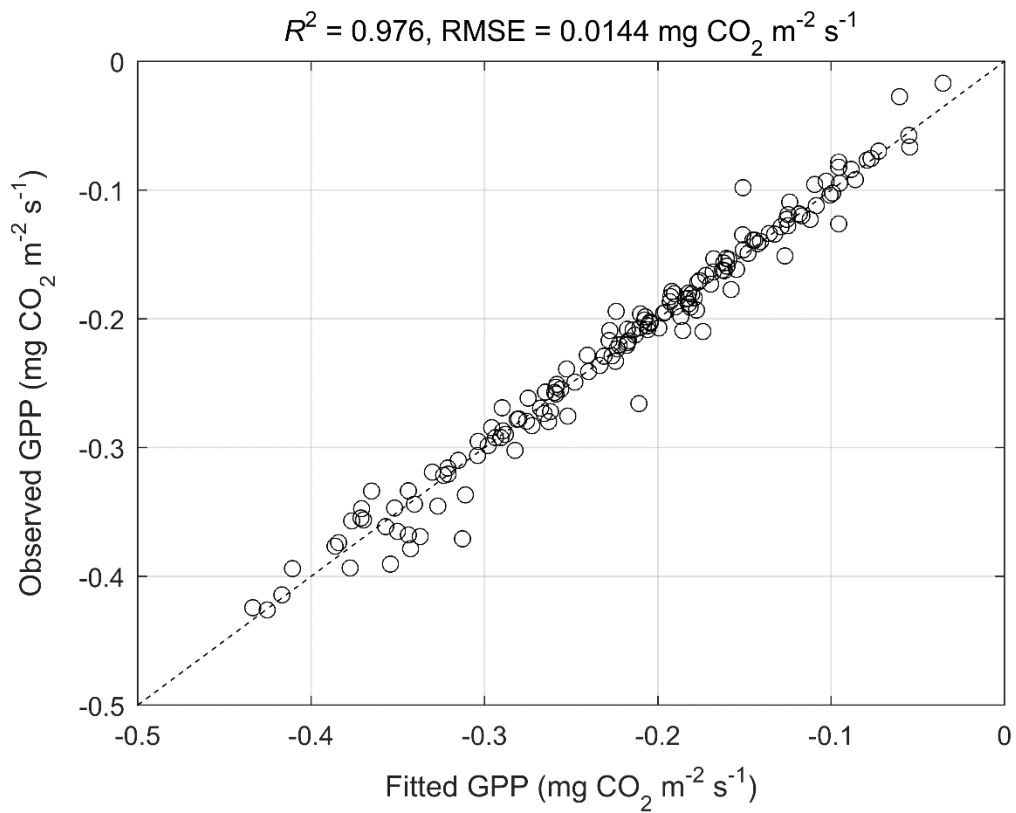

**Supplementary Figure 3.** Measured gross primary production GPP versus the GPP calculated using the fitted  $\alpha$  and  $GP_{\max}$  values. These values were used for determining the constant  $GP_{\max}/\alpha$  ratio, which was then used for standardizing the fluxes at  $PAR = 800 \mu\text{mol m}^{-2} \text{s}^{-1}$ . The ratio was determined as the median from those  $\alpha$  and  $GP_{\max}$  values estimated from the PAR response measurements that included three or four light levels and had the highest  $PAR > 800 \mu\text{mol m}^{-2} \text{s}^{-1}$ . The four-level cases are shown in the figure. Source data are provided as a Source Data file.

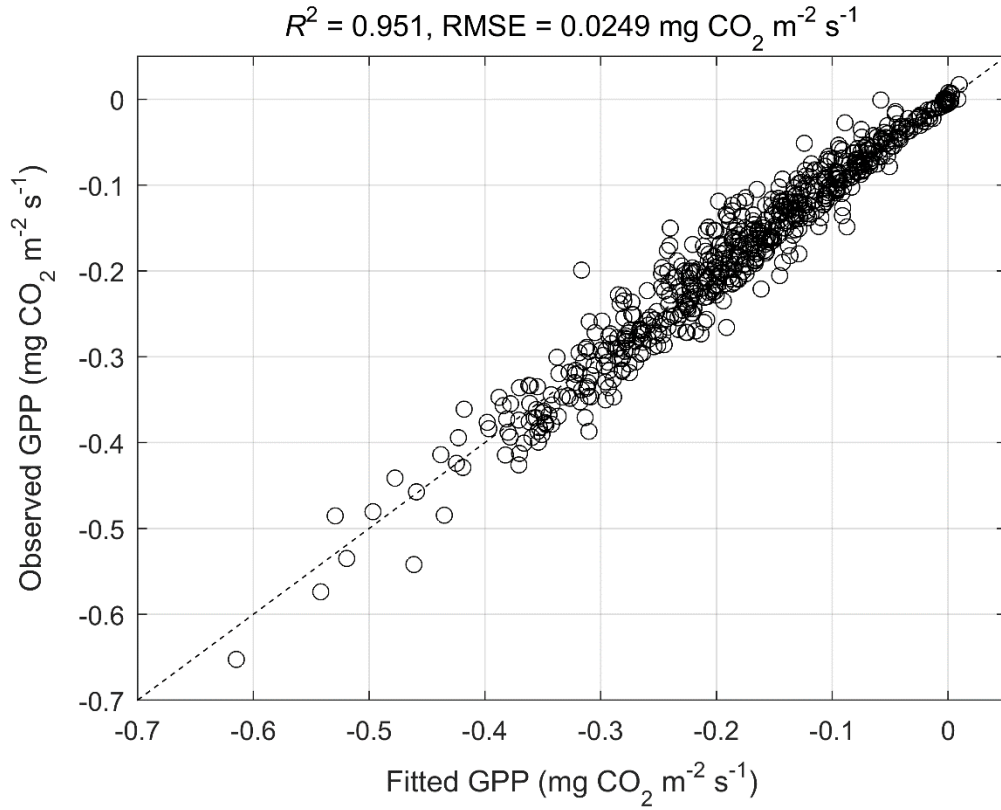

**Supplementary Figure 4.** The measured GPP versus the GPP calculated using the constant  $GP_{\max}/\alpha$  ratio (of  $203 \mu\text{mol m}^{-2} \text{ s}^{-1}$ ) and the  $\alpha$  parameter estimated for each PAR response measurement. The figure shows all cases in which three or four light levels were available. Source data are provided as a Source Data file.

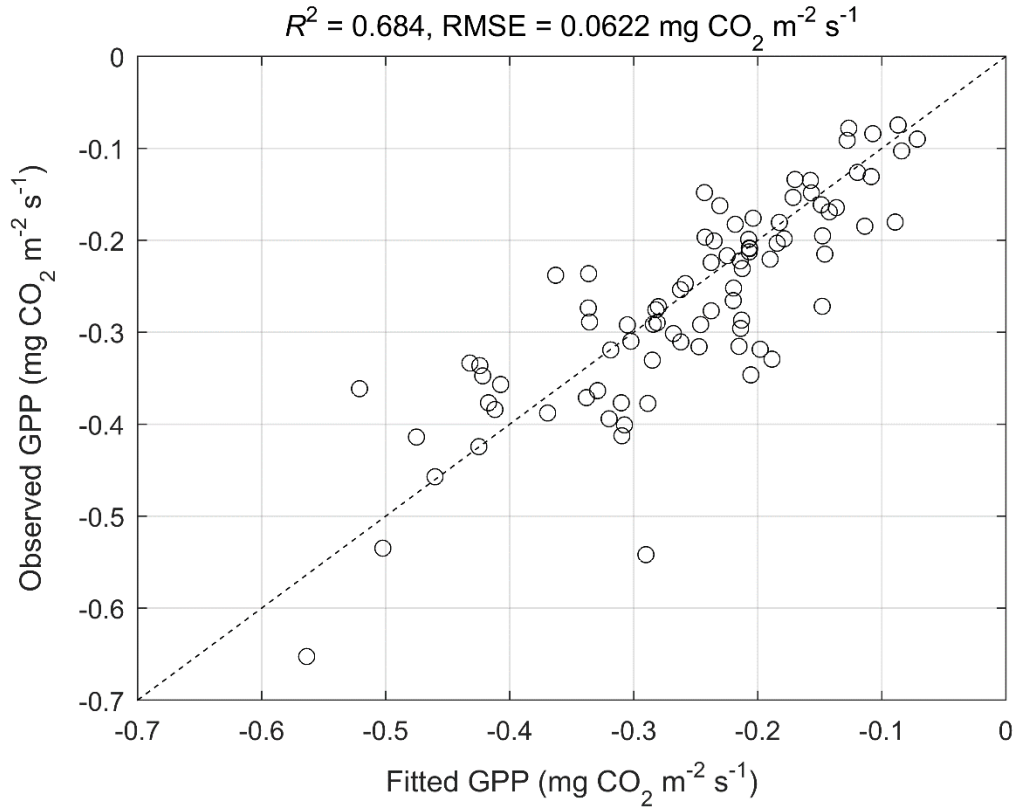

**Supplementary Figure 5.** Measured GPP versus the predicted GPP at the highest radiation level, based on a response function fit in which this data point was excluded when estimating the  $\alpha$  parameter. This illustrates the uncertainty related to extrapolation of the PAR response beyond the highest light level observed. All data with at least three light levels and the highest PAR within  $500\text{--}1100 \mu\text{mol m}^{-2} \text{ s}^{-1}$  were included. Source data are provided as a Source Data file.

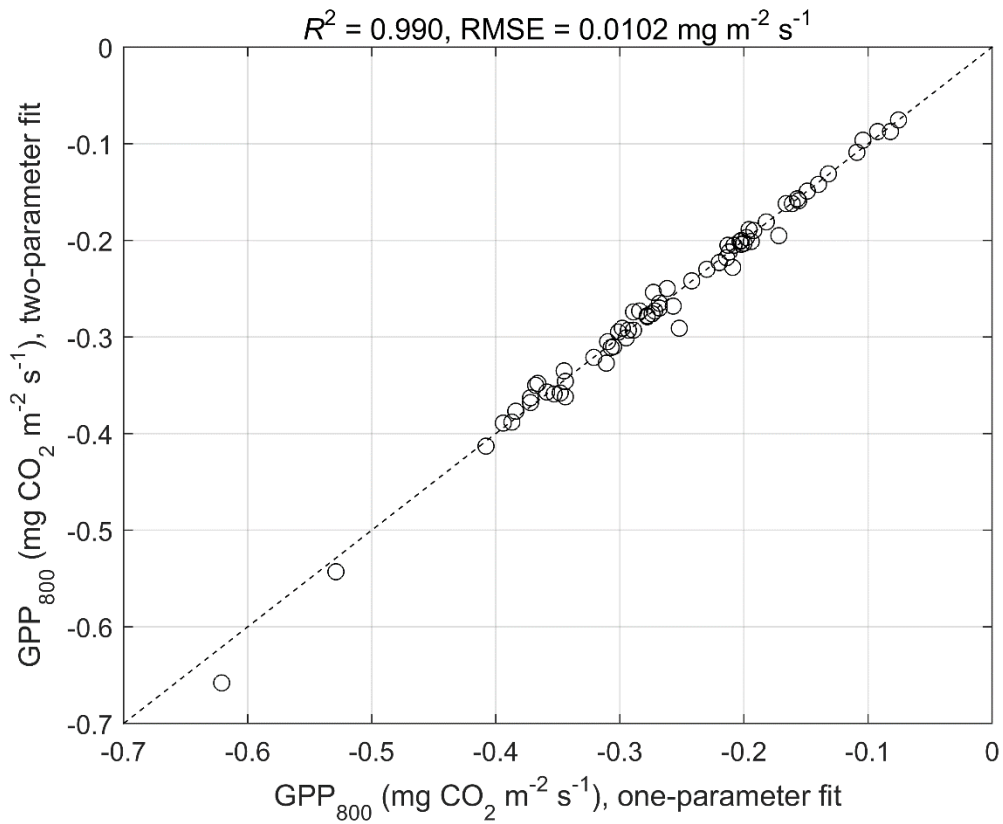

**Supplementary Figure 6.** GPP<sub>800</sub> calculated with fits based on two free parameters ( $\alpha$  and GP<sub>max</sub>) versus the GPP<sub>800</sub> calculated with fits based on one free parameter ( $\alpha$ ) and a fixed  $\alpha$ /GP<sub>max</sub> ratio. This illustrates the uncertainty related to using a constant  $\alpha$ /GP<sub>max</sub> in flux standardization. The data include the cases that were used for determining the fixed  $\alpha$ /GP<sub>max</sub>. Source data are provided as a Source Data file.

**Supplementary Table 1. The mean percentage (s.e.m.) of leaves that belonged to the four damage categories (0, 1–4, 5–20 and > 20% of leaf area damaged) in *Betula* plantlets and the mean damage index (s.e.m.) calculated from these values in the four treatment combinations in 2017 ( $n = 57–60$  per treatment) and 2019 ( $n = 44–55$ ).**

|                         | 0%<br>damaged | 1–4%<br>damaged | 5–20%<br>damaged | > 20%<br>damaged | Damage<br>index |
|-------------------------|---------------|-----------------|------------------|------------------|-----------------|
| 2017                    |               |                 |                  |                  |                 |
| Control                 | 74.3 (3.41)   | 22.9 (3.24)     | 2.2 (0.53)       | 0.5 (0.34)       | 0.38 (0.12)     |
| Herbivory reduction (H) | 89.1 (2.30)   | 10.5 (2.27)     | 0.3 (0.21)       | 0.1 (0.08)       | 0.07 (0.04)     |
| Warming                 | 76.6 (3.47)   | 18.9 (2.93)     | 2.9 (0.86)       | 1.7 (0.77)       | 0.38 (0.12)     |
| Warming + H             | 87.0 (2.14)   | 10.4 (1.81)     | 2.4 (0.66)       | 0.1 (0.11)       | 0.18 (0.07)     |
| 2019                    |               |                 |                  |                  |                 |
| Control                 | 83.3 (2.76)   | 10.9 (2.30)     | 2.2 (0.63)       | 3.6 (1.04)       | 0.34 (0.11)     |
| Herbivory reduction (H) | 91.3 (1.51)   | 6.8 (1.12)      | 1.5 (0.72)       | 0.4 (0.31)       | 0.08 (0.04)     |
| Warming                 | 83.9 (2.91)   | 10.0 (1.70)     | 3.4 (0.89)       | 2.8 (1.09)       | 0.29 (0.10)     |
| Warming + H             | 88.6 (1.66)   | 10.0 (1.48)     | 0.9 (0.41)       | 0.5 (0.40)       | 0.18 (0.07)     |

Source data are provided as a Source Data file.



**Supplementary Table 2. Statistics of warming (ambient and +3 °C) and herbivory (normal and reduced) effects on leaf damage index in the additional 2019 survey (N = 193).**

|                           | <i>F</i> | <i>P</i>         |
|---------------------------|----------|------------------|
| Soil OM content           | 0.7      | 0.392            |
| Vascular plant cover      | 13.6     | <b>&lt;0.001</b> |
| Lichen cover              | 0.4      | 0.509            |
| Moss cover                | 0.5      | 0.494            |
| Warming (W)               | 0.8      | 0.376            |
| Herbivory reduction (H)   | 16.4     | <b>&lt;0.001</b> |
| <i>Betula</i> species (S) | 5.6      | <b>0.022</b>     |
| W×H                       | 3.1      | 0.078            |
| W×S                       | 0.7      | 0.577            |
| H×S                       | 3.0      | <b>0.034</b>     |
| W×H×S                     | 0.2      | 0.922            |

The data was log-transformed and analyzed using linear mixed models and Type I Anova (with two-sided significance tests). Soil OM content and the areal cover of vascular plants, mosses and lichens were treated as covariates and added to the model to remove plot-to-plot variation that might otherwise confound the treatment effects. Field replicate block and birch genotype (nested within species) were included in the model as random effects, but are not reported. Values of  $P < 0.05$  are in bold.

**Supplementary Table 3. Statistics of warming (ambient and +3 °C) and herbivory (normal and reduced) effects on bud break timing and the relative growth of the experimental birch plantlets in 2017 and 2018 ( $N = 232\text{--}239$  for each year).**

|                           | Bud break timing |                  | Relative growth |                  |
|---------------------------|------------------|------------------|-----------------|------------------|
|                           | <i>F</i>         | <i>P</i>         | <i>F</i>        | <i>P</i>         |
| Soil OM content           | 0.6              | 0.434            |                 |                  |
| Vascular plant cover      | 9.0              | <b>0.003</b>     |                 |                  |
| Lichen cover              | 0.4              | 0.560            | 5.2             | <b>0.023</b>     |
| Moss cover                | 40.0             | <b>&lt;0.001</b> |                 |                  |
| Year (Y)                  | 4835             | <b>&lt;0.001</b> | 225.1           | <b>&lt;0.001</b> |
| Warming (W)               | 39.5             | <b>&lt;0.001</b> | 4.0             | <b>0.046</b>     |
| Herbivory reduction (H)   | 15.8             | <b>&lt;0.001</b> | 10.4            | <b>&lt;0.001</b> |
| <i>Betula</i> species (S) | 1.5              | 0.283            | 0.1             | 0.940            |
| W×Y                       | 11.1             | <b>&lt;0.001</b> | 2.5             | 0.113            |
| H×Y                       | 3.0              | 0.083            | 10.1            | <b>0.002</b>     |
| S×Y                       | 8.3              | <b>&lt;0.001</b> | 6.0             | <b>0.001</b>     |
| W×H                       | 1.8              | 0.185            | 0.6             | 0.434            |
| W×S                       | 7.0              | <b>&lt;0.001</b> | 0.1             | 0.964            |
| H×S                       | 1.2              | 0.319            | 1.2             | 0.293            |
| W×H×Y                     | 2.8              | 0.095            | 0.0             | 0.955            |
| W×S×Y                     | 5.3              | <b>0.001</b>     | 0.4             | 0.781            |
| H×S×Y                     | 1.4              | 0.254            | 0.9             | 0.439            |
| W×H×S                     | 0.1              | 0.955            | 1.6             | 0.201            |
| W×H×S×Y                   | 0.4              | 0.734            | 0.3             | 0.847            |

The data were analyzed using repeated measures linear mixed models and Type I Anova (with two-sided significance tests). Year was treated in the models as a repeated measure. Soil OM content and the areal cover of vascular plants, mosses and lichens were treated as covariates and added to models to remove plot-to-plot variation that might otherwise confound the treatment effects (but omitted from the final model if redundant). Field replicate block and birch genotype (nested within species) were included in the models as random effects, but are not reported. Relative growth was log-transformed before analysis. Values of  $P < 0.05$  are in bold.

**Supplementary Table 4. Statistics of warming (ambient and +3 °C) and herbivory (normal and reduced) effects on the summer and autumn leaf chlorophyll content of the experimental birch plantlets in 2017–2018.**

|                           | Summer 2017 |                  | Summer 2018 |                  | Autumn 2017 |                  | Autumn 2018 |                  |
|---------------------------|-------------|------------------|-------------|------------------|-------------|------------------|-------------|------------------|
|                           | <i>F</i>    | <i>P</i>         | <i>F</i>    | <i>P</i>         | <i>F</i>    | <i>P</i>         | <i>F</i>    | <i>P</i>         |
| Soil OM content           | 0.3         | 0.600            | 0.9         | 0.354            | 2.2         | 0.142            | 0.5         | 0.506            |
| Vascular plant cover      | 1.1         | 0.290            | 10.5        | <b>0.001</b>     | 1.2         | 0.267            | 9.0         | <b>0.003</b>     |
| Lichen cover              | 0.0         | 0.965            | 0.0         | 0.834            | 2.3         | 0.129            | 8.3         | <b>0.005</b>     |
| Moss cover                | 16.4        | <b>&lt;0.001</b> | 50.8        | <b>&lt;0.001</b> | 42.7        | <b>&lt;0.001</b> | 70.8        | <b>&lt;0.001</b> |
| Date (D)                  | 14.1        | <b>&lt;0.001</b> | 575.7       | <b>&lt;0.001</b> | 657.4       | <b>&lt;0.001</b> | 602.0       | <b>&lt;0.001</b> |
| Warming (W)               | 5.1         | <b>0.025</b>     | 19.7        | <b>&lt;0.001</b> | 33.4        | <b>&lt;0.001</b> | 83.3        | <b>&lt;0.001</b> |
| Herbivory reduction (H)   | 13.3        | <b>&lt;0.001</b> | 26.5        | <b>&lt;0.001</b> | 10.9        | <b>0.001</b>     | 24.1        | <b>&lt;0.001</b> |
| <i>Betula</i> species (S) | 3.2         | 0.083            | 1.6         | 0.274            | 12.2        | <b>0.003</b>     | 17.5        | <b>0.001</b>     |
| W×D                       | 3.3         | 0.071            | 6.8         | <b>0.001</b>     | 15.1        | <b>&lt;0.001</b> | 18.7        | <b>&lt;0.001</b> |
| H×D                       | 1.9         | 0.173            | 7.5         | <b>0.001</b>     | 2.3         | <b>0.010</b>     | 1.5         | 0.131            |
| S×D                       | 3.8         | <b>0.011</b>     | 1.8         | 0.100            | 19.6        | <b>&lt;0.001</b> | 11.1        | <b>&lt;0.001</b> |
| W×H                       | 0.5         | 0.465            | 4.1         | <b>0.043</b>     | 0.0         | 0.903            | 6.2         | <b>0.014</b>     |
| W×S                       | 0.2         | 0.868            | 0.8         | 0.506            | 8.2         | <b>&lt;0.001</b> | 13.8        | <b>&lt;0.001</b> |
| H×S                       | 0.5         | 0.717            | 2.4         | 0.066            | 1.4         | 0.246            | 2.4         | 0.073            |
| W×H×D                     | 0.4         | 0.549            | 2.1         | 0.129            | 2.0         | <b>0.026</b>     | 0.6         | 0.812            |
| W×S×D                     | 0.8         | 0.490            | 0.6         | 0.736            | 6.2         | <b>&lt;0.001</b> | 14.7        | <b>&lt;0.001</b> |
| H×S×D                     | 0.3         | 0.803            | 1.0         | 0.455            | 0.6         | 0.975            | 0.9         | 0.617            |
| W×H×S                     | 0.1         | 0.979            | 1.5         | 0.213            | 0.3         | 0.834            | 1.5         | 0.227            |
| W×H×S×D                   | 1.4         | 0.256            | 0.6         | 0.700            | 0.5         | 0.986            | 0.7         | 0.907            |

The data were analyzed using repeated linear mixed models and Type I Anova (with two-sided significance tests). Date was treated in the models as a repeated measure (2–3 dates for summers, 12–10 dates for autumns,  $N = 234$ – $235$  for 2017,  $N = 181$ – $235$  for 2018). Soil OM content and the areal cover of vascular plants, mosses and lichens were treated as covariates and added to models to remove plot-to-plot variation that might otherwise confound the treatment effects. Field replicate block and birch genotype (nested within species) were included in the models as random effects, but are not reported. Values of  $P < 0.05$  are in bold.

**Supplementary Table 5. Statistics of warming (ambient and +3 °C) and herbivory (normal and reduced) effects on (a) the resin capture of soil mineral N (sum of NH<sub>4</sub><sup>+</sup> and NO<sub>3</sub><sup>-</sup>) and (b) soil microbial biomass carbon (MBC).**

| <b>(a) Mineral N</b>    | <i>F</i> | <i>P</i>     |
|-------------------------|----------|--------------|
| Soil OM content         | 3.0      | 0.116        |
| Vascular plant cover    | 4.5      | 0.065        |
| Lichen cover            | 21.1     | <b>0.001</b> |
| Moss cover              | 5.6      | <b>0.041</b> |
| Year (Y)                | 5.6      | <b>0.030</b> |
| Warming (W)             | 2.3      | 0.167        |
| Herbivory reduction (H) | 12.1     | <b>0.008</b> |
| W×H                     | 5.3      | <b>0.050</b> |
| W×Y                     | 0.04     | 0.849        |
| H×Y                     | 1.2      | 0.285        |
| W×H×Y                   | 0.03     | 0.872        |

  

| <b>(b) MBC</b>          | <i>F</i> | <i>P</i>         |
|-------------------------|----------|------------------|
| Soil OM content         | 0.9      | 0.370            |
| Vascular plant cover    | 5.3      | <b>0.045</b>     |
| Lichen cover            | 4.9      | <b>0.049</b>     |
| Moss cover              | 1.4      | 0.259            |
| Soil layer (L)          | 3951     | <b>&lt;0.001</b> |
| Warming (W)             | 0.2      | 0.649            |
| Herbivory reduction (H) | 3.8      | 0.085            |
| W×H                     | 12.0     | <b>0.008</b>     |
| W×L                     | 1.2      | 0.325            |
| H×L                     | 4.4      | <b>0.020</b>     |
| W×H×L                   | 0.3      | 0.772            |

Data were analyzed using repeated measures linear mixed models and Type I Anova (with two-sided significance tests). Year (mineral N data,  $n = 20$  for each year) and soil layer (three layers, MBC data,  $n = 20$  for each layer) were treated in the models as repeated measures. Soil OM content and the areal cover of vascular plants, mosses and lichens were treated as covariates and added to models to remove plot-to-plot variation that might otherwise confound the treatment effects (but omitted from the final model if redundant). Field replicate block was included in the models as a random effect, but is not reported. Mineral N was log-transformed and MBC square-root transformed before analysis. Values of  $P < 0.05$  are in bold.

**Supplementary Table 6. Monthly mean air temperature and precipitation during the May–November warming period in the study years 2017 and 2018 and in the reference years 1981–2010.**

|           | Mean temperature (°C) |      |           | Precipitation (mm) |      |           |
|-----------|-----------------------|------|-----------|--------------------|------|-----------|
|           | 2017                  | 2018 | 1981–2010 | 2017               | 2018 | 1981–2010 |
| May       | 1.9                   | 7.2  | 3.7       | 11                 | 13   | 19        |
| June      | 7.8                   | 9.4  | 9.6       | 49                 | 52   | 42        |
| July      | 13.6                  | 18.1 | 13.1      | 161                | 56   | 62        |
| August    | 10.4                  | 11.4 | 10.7      | 63                 | 111  | 48        |
| September | 6.5                   | 7.1  | 5.7       | 34                 | 70   | 30        |
| October   | 0.7                   | -1.2 | -0.5      | 12                 | 15   | 33        |
| November  | -8.2                  | -1.7 | -8.3      | 42                 | 23   | 24        |

Data from Kevo weather station (Finnish Meteorological Institute), ca. 200 m from the study site.

**Supplementary Table 7. Statistics of warming (ambient and +3 °C) and herbivory (normal and reduced) on soil moisture in 2017 and 2018.**

|                         | 2017     |                  | 2018     |                  |
|-------------------------|----------|------------------|----------|------------------|
|                         | <i>F</i> | <i>P</i>         | <i>F</i> | <i>P</i>         |
| Soil OM                 | 1.0      | 0.337            | 0.1      | 0.325            |
| Vascular plants         | 3.9      | 0.071            | 69.1     | <b>0.001</b>     |
| Lichens                 | 1.1      | 0.321            | 12.0     | <b>0.037</b>     |
| Mosses                  | 1.8      | 0.204            | 4.1      | 0.282            |
| Date (D)                | 57.1     | <b>&lt;0.001</b> | 166      | <b>&lt;0.001</b> |
| Warming (W)             | 1.6      | 0.303            | 4.4      | 0.272            |
| Herbivory reduction (H) | 0.0      | 0.969            | 0.0      | 0.674            |
| D×W                     | 0.9      | 0.440            | 4.2      | 0.499            |
| D×H                     | 0.2      | 0.878            | 0.5      | 0.982            |
| W×H                     | 0.0      | 0.993            | 1.8      | 0.500            |
| W×H×D                   | 0.3      | 0.816            | 4.4      | 0.054            |

The data were analyzed using repeated measures linear mixed models and Type I Anova (with two-sided significance tests). Date was treated in the models as a repeated measure (four and six dates for 2017 and 2018 respectively,  $n = 20$  for each date). Soil OM content and the areal cover of vascular plants, mosses and lichens were treated as covariates and added to models to remove plot-to-plot variation that might otherwise confound the treatment effects. Field replicate block was included in the models as a random effect, but is not reported. Values of  $P < 0.05$  are in bold.

**Supplementary Table 8. Statistics of herbivory (normal and reduced) and warming (ambient and +3 °C) effects on net ecosystem CO<sub>2</sub> exchange (NEE) using different PAR levels for standardizing the fluxes.**

|                         | NEE <sub>1200</sub> |                  | NEE <sub>800</sub> |                  | NEE <sub>300</sub> |                  |
|-------------------------|---------------------|------------------|--------------------|------------------|--------------------|------------------|
|                         | <i>F</i>            | <i>P</i>         | <i>F</i>           | <i>P</i>         | <i>F</i>           | <i>P</i>         |
| 2017                    |                     |                  |                    |                  |                    |                  |
| Soil OM content         | 0.3                 | 0.585            | 0.2                | 0.687            | 0.1                | 0.764            |
| Vascular plant cover    | 10.4                | <b>0.011</b>     | 9.3                | <b>0.014</b>     | <b>4.8</b>         | <b>0.057</b>     |
| Lichen cover            | 19.7                | <b>0.001</b>     | 20.5               | <b>0.001</b>     | <b>24.3</b>        | <b>0.001</b>     |
| Moss cover              | 1.6                 | 0.230            | 1.8                | 0.211            | 2.6                | 0.140            |
| Date (D)                | 51.5                | <b>&lt;0.001</b> | 46.5               | <b>&lt;0.001</b> | <b>27.6</b>        | <b>&lt;0.001</b> |
| Warming (W)             | 2.2                 | 0.175            | 2.0                | 0.190            | 1.3                | 0.277            |
| Herbivory reduction (H) | 6.1                 | <b>0.037</b>     | 5.7                | <b>0.043</b>     | 3.7                | 0.091            |
| W×H                     | 1.1                 | 0.323            | 1.0                | 0.352            | 0.4                | 0.525            |
| W×D                     | 2.8                 | <b>0.034</b>     | 2.9                | <b>0.029</b>     | <b>3.3</b>         | <b>0.016</b>     |
| H×D                     | 1.2                 | 0.337            | 1.1                | 0.355            | 0.9                | 0.458            |
| W×H×D                   | 0.3                 | 0.907            | 0.2                | 0.916            | 0.2                | 0.957            |
| 2018                    |                     |                  |                    |                  |                    |                  |
| Soil OM content         | 0.1                 | 0.811            | 0.02               | 0.895            | 0.2                | 0.680            |
| Vascular plant cover    | 1.0                 | 0.333            | 0.7                | 0.411            | 0.0                | 0.967            |
| Lichen cover            | 7.8                 | <b>0.018</b>     | 8.2                | <b>0.016</b>     | 10.3               | <b>0.009</b>     |
| Moss cover              | 5.4                 | <b>0.042</b>     | 5.2                | <b>0.046</b>     | 4.2                | 0.070            |
| Date (D)                | 32.7                | <b>&lt;0.001</b> | 31.5               | <b>&lt;0.001</b> | 28.0               | <b>&lt;0.001</b> |
| Warming (W)             | 13.3                | <b>0.006</b>     | 13.2               | <b>0.006</b>     | 12.2               | <b>0.008</b>     |
| Herbivory reduction (H) | 8.7                 | <b>0.018</b>     | 8.3                | <b>0.020</b>     | 6.2                | <b>0.038</b>     |
| W×H                     | 0.5                 | 0.507            | 0.4                | 0.534            | 0.2                | 0.687            |
| W×D                     | 1.5                 | 0.142            | 1.5                | 0.129            | 1.7                | 0.076            |
| H×D                     | 1.3                 | 0.208            | 1.3                | 0.215            | 1.2                | 0.269            |
| W×H×D                   | 1.5                 | 0.149            | 1.5                | 0.154            | 1.4                | 0.191            |

Treatment effects on net ecosystem exchange (NEE<sub>1200</sub>, NEE<sub>800</sub>, NEE<sub>300</sub>) were tested using repeated measures linear mixed models and Type I ANOVA (with two-sided significance tests), where the variance is allocated to explanatory variables in the order of their appearance. Soil organic matter (OM) content and cover of vascular plants, lichens and mosses are continuous variables that describe the variation among the experimental plots prior to the establishment of the experiment. They were used in the models as covariates to remove plot-to-plot variation that might otherwise confound the treatment effects. Years were analyzed separately ( $N = 100$  for 2017,  $N = 240$  for 2018). Date was treated as a repeated measure, warming and herbivory reduction as fixed effects and treatment block (not reported) as a random effect. *F* and *P* indicate *F*-statistics and *P*-values respectively;  $P < 0.05$  are in bold. As GPP<sub>1200</sub> and GPP<sub>300</sub> are proportional to GPP<sub>800</sub>, they produce the same results as GPP<sub>800</sub> (Table 2). Values of  $P < 0.05$  are in bold. Source data are provided as a Source Data file.
